# Supplementary material for: Expression of RsPORB Is Associated with Radish Root Color
Source: MDPI journal article supplement (doi:10.3390/plants12112214), 2023-06-03
Supplement: s1 [file s1]

**Table S1.** Gene specific primers used in this study

| Usage                        | Primer name       | Primer sequence (5'-3')             |
|------------------------------|-------------------|-------------------------------------|
| Gene cloning                 | RsPORB-promoter-F | AATGTTTCATGGACAATCCTCCTGATTGT       |
|                              | RsPORB-promoter-R | TTGAAGGGCCATTTTTGGACAAAACAGAGA      |
|                              | RsPORB-F          | ATGGCCCTTCAAGCCGCTTCTTTGGTC         |
|                              | RsPORB-R          | TTAGGCCAAGCCAACCAGCTTCTCAC          |
| Gene expression              | RsPORA-F          | ACGGTGAAAAGGCATATAAA                |
|                              | RsPORA-R          | GCTCTCTGAACAAACCTGTC                |
|                              | RsPORB-F          | GACAGAGTCTGGCAAAAGAC                |
|                              | RsPORB-R          | TGATCTCCCAAACCTTTACG                |
|                              | RsPORC-F          | CAGAGAACACATACCCCTGT                |
|                              | RsPORC-R          | CACCTGTGCTAGTCTTTTCC                |
|                              | RsRP11-F          | ATCACGCTAAATGGTCTCCT                |
|                              | RsRP11-R          | GCTGCTCTCAATCAAGTCAATC              |
| Virus-induced gene silencing | pTRV2-RsPORB-F    | CGACGACAAGACCCTAAAGATGTAAACTGA      |
|                              | pTRV2-RsPORB-R    | GAGGAGAAGAGCCCTAGCTTTCGGTGGTACGT    |
|                              | pTRV2-RsPORs-F    | CGACGACAAGACCCTAAATGGCACGTGAT       |
|                              | pTRV2-RsPORs-R    | GAGGAGAAGAGCCCTACATGTTGCACACTT      |
| Promoter activation assay    | RsPORB-promoter-F | AATGTTTCATGGACAATCCTCCTGATTGT       |
|                              | RsPORB-dP1-R      | GTTTGGATAATTTTCTTGGTTTATAATTTTTA    |
|                              | RsPORB-dP1-F      | TAAAAATTATAAACCAAGAAAATTATCCAAAC    |
|                              | RsPORB-dP2-R      | CTTTGGCATGGGAGAAGAAGAAGATATCCTACAA  |
|                              | RsPORB-dP2-F      | TTGTAGGATATCTTCTTCTTCTCCCATGCCAAAG  |
|                              | RsPORB-promoter-R | TTGAAGGGCCATTTTTGGACAAAACAGAGA      |
|                              | pUC-RsPORB-fLUC-F | AGGCTCTAGAGGATCCAATGTTTCATGGACAATCC |
|                              | pUC-RsPORB-fLUC-R | TTGGCGTCTTCCATGGTTTTGGACAAAACAGA    |

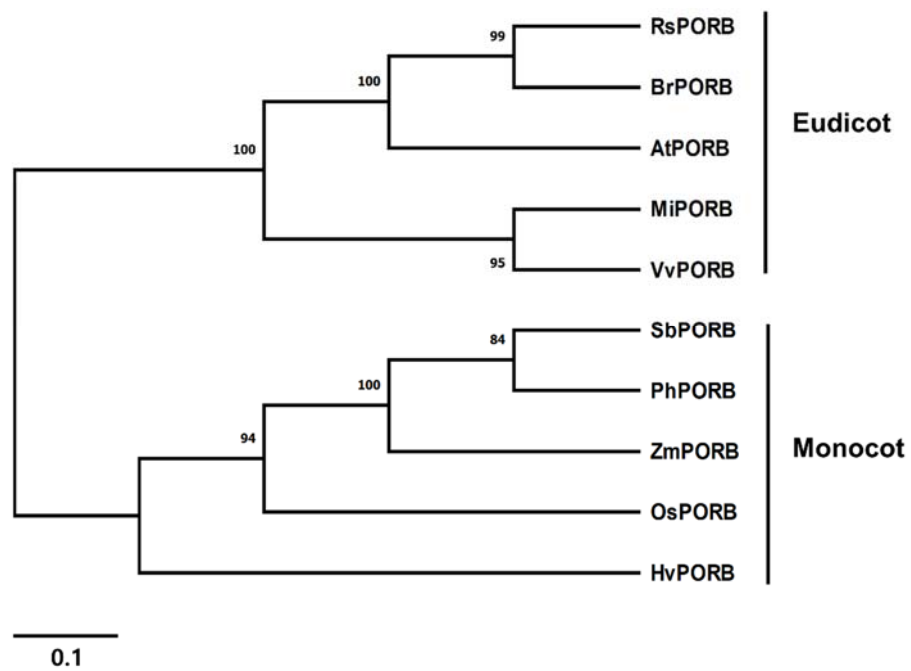

**Figure S1. Phylogenetic relationships among PORB proteins from radish and other plants.** The phylogenetic tree was constructed using the neighbor-joining method with MEGAX software. Numbers next to the nodes are bootstrap values from 1000 replications.

**A**

*proRsPORB-G1*

```

-1000      AATGTTTCATG GACAATCCTC CTGATTGTCA AACTCTTCGT
-960 AAGGGTGTCT TCGCTGCGGG TGCCCTCCTTT GTCTTCTTCA ACGCCATTGT TTCTCAGTTC
-900 TATTATTTCT TCTACTCCTC TGCTGCTGCC GCCTCCCTCT CGCCTTACTA GAGGATTTGA
-840 ACCAATAAAA ATAAGTTTGT TTATTTCTTA TGTGTTATGT GATATCATAC TAATGTCATA
-780 TCTTGGGCCT GTTGCTTGTT AAAGTATATG ACTGCAAAAT TACTTGAAGT TGAGGGTACG
-720 ACTATGAGTT TTGTTAGATG GATTTGTATG GATATTGAAT TGAAATGTTG TTCTTAAAAA
-660 GCTGATCTAA TGTGGTTTTT ACCGAACAAA AAAAAACCAG TGTGCTAGAC TGCTGTGCTA
-600 TATGTTATAT ATTTGTTAAT TCAACACATG TTAGAAGTTT TATATATGCA ACTAATAGTT
-540 GTAAGATGAT GGTAAGCAT GAACAATATG ATAAATAATA TATGCTTTTA TTACCTTAAA
-480 TTTTGAAAAT TGCTTGTTAA ATTTTCAGTTA CACTTTAAAA TTACTTCGAA TTATATACAC
-420 AAAAATTATA AACCAAGAAA ATTATCCAAA CATATCAGAG TAACCATGAC GAATAGTTTG
-360 TAAGATATCT TCTTCTCCCA TGCCAAAGTA TGAATCCCA TGAACA CCAA TCACCATCCT
-300 TTATTGCAAT GTTACCAAAA CAGCCAATAA AATAAAATAT CTACTGAGAG GAAAATCTAG
-240 CCCTCGAATT CTCATTGGAT ATCTAATGAT GATGTGGCAG ATACTTTCTT TAAGATAATG
-180 TTATCCACAC ATCTTCTCTG TGATTTCTCT GGGGACCACT CTCTCCCTTG TCCGAATTC
-120 TCACCTCCTC CACTCCTTCG CGAGTATACA TAAACGCGTC TACACTCTCG CAAAATATCA
-60 ACTTCAGTAG TCTTCTTCTT CATTGCTATT GCTATCTCTC ACTCTCTGTT TTGTCCAAAA

```

CCAAT motif Dof CAACA motif

**B**

*proRsPORB-W1*

```

-1038      AATGTTCA TGGACAATCC
-1020 TCCTGATTGT CAAACTCTTC GTAAGGGTGT CTTCGCTGCG GGTGCCTCCT TTGTCTTCTT
-960 CAACGCCATT GTTCTCAGT TCTATTATTT CTCTACTCC TCTGCTGCT CCGCCTCCCT
-900 CTCGCCTTAC TAGAGGATTT GAACCAACAA AAATAAGTTT GTTTATTTCT TGTGTTATGT
-840 GATACCATAC AAATGTCATA TTTTGGGCCT GTTGCTTGTT AAAGTATATG ACTGCAAAAT
-780 TACTTGAAGT TGAGGGTACG ACTATGAGTT TTGTCAGATG GATTTGTATG GATATTGAAT
-720 TGAAATGTTG TTCTTAAGAA GCTGATCTAA TGTGGTTTTT ACCAAACAAA AAAAATCAG
-660 TGTGCTAGAC TGCTATATGT TATATTTGTT AATTCAACAC ATGTTACAAG TTTTATAAAT
-600 GCAACTAATA GTTGTAAGAT GATGGCAGAG CATGAACAAT ATGATAGATA ATAATATATG
-540 TCTTTATTAC CTTGAAAATA GAAAATTGCT TGTTAAATTT CAGTTACACT TTAAATTTAC
-480 TTTGAGTTAT ATGAATAAAA ATTATAAAC AACAAAATGG GAAAATTATC CAAACATATC
-420 AGAGTAACCA TGACGAATAG TTTGTAGGAT ATCTTCTTGT CAAAAGAAA AAAGAAAAG
-360 AAAGAAAT CTTCTTCTCC CATGCCAAAG TATGGAATCC CATAAACACC AATCACCATC
-300 CTTTATTGCA ATGTTACCAA AACAGCCAAT AAAATAAAAT ATCTACTGAG AGGGAAATCT
-240 AGCCCTCGAA TTCTCATTGG ATATCTAATG ATGATGTGGC AGATACTTTC TTAAAGATAA
-180 TGTATCCAC ACATCTTCTC TCTGATTCT CTGGGGACCA CTCTCTCCCT TGTCGAACT
-120 TCACCTCCTC CACTCCTTCA CGAGTATACA TAAACGCGTA CACACTCTCG CAAAATATC
-60 AACTTCAGTA GTCTTCTTCA TCGCTATTGC TATCTCTCTC AACTCTGTT TTGTCCAAAA

```

CCAAT motif Dof CAACA motif

**C**

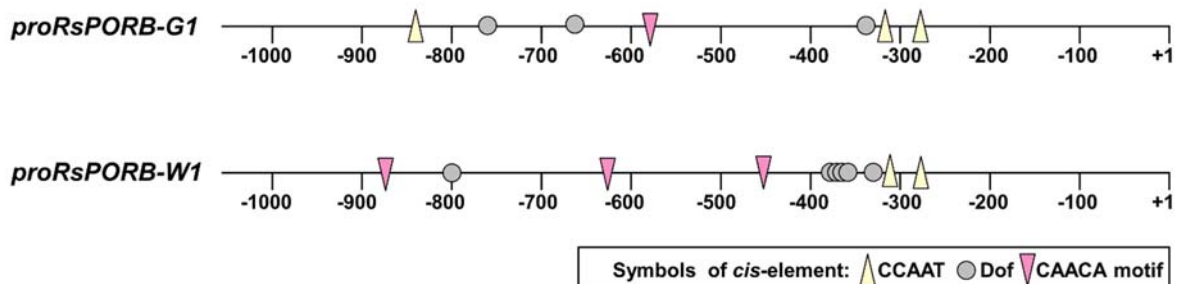

**Figure S2. Nucleotide sequences of *RsPORB* promoters from radish cultivars G1 and W1.** Partial promoter of *RsPORB-G1* (A) and *RsPORB-G1* (B). Putative several *cis*-elements are indicated by different colors. The CCAAT motif is indicated by a yellow box, Dof motif by dark grey boxes, and CAACA motif by pink boxes. (C) Schematic of the proRsPORB-G1 and proRsPORB-W1 showing putative *cis*-elements involved in chlorophyll biosynthesis. The *cis*-elements are indicated by different symbols.
